1 **Title**

2 Rif1 functions in a tissue-specific manner to control replication timing through its PP1-binding  
3 motif

4  
5 **Running Title:** Rif1-dependent control of RT during development

6 **Authors**

7 Robin L. Armstrong<sup>1, †</sup>, Souradip Das<sup>2, †</sup>, Christina A. Hill<sup>3</sup>, Robert J. Duronio<sup>1,3,4,5,6,\*</sup>, and Jared  
8 T. Nordman<sup>2,\*</sup>

9

10 **Affiliations**

11 <sup>1</sup> Curriculum in Genetics and Molecular Biology, University of North Carolina, Chapel Hill, NC  
12 27599, USA.

13 <sup>2</sup> Department of Biological Sciences, Vanderbilt University, Nashville, TN 37232, USA

14 <sup>3</sup> Integrative Program for Biological and Genome Sciences, University of North Carolina, Chapel  
15 Hill, NC 27599, USA.

16 <sup>4</sup> Department of Genetics, University of North Carolina, Chapel Hill, NC 27599, USA.

17 <sup>5</sup> Department of Biology, University of North Carolina, Chapel Hill, NC 27599, USA.

18 <sup>6</sup> Lineberger Comprehensive Cancer Center, University of North Carolina, Chapel Hill, NC 27599,  
19 USA.

20 † These authors contributed equally to this work

21 \*Correspondence: [duronio@med.unc.edu](mailto:duronio@med.unc.edu); [jared.nordman@vanderbilt.edu](mailto:jared.nordman@vanderbilt.edu)

22 **Abstract**

23 Replication initiation in eukaryotic cells occurs asynchronously throughout S phase, yielding early  
24 and late replicating regions of the genome, a process known as replication timing (RT). RT changes  
25 during development to ensure accurate genome duplication and maintain genome stability. To  
26 understand the relative contributions that cell lineage, cell cycle, and replication initiation  
27 regulators have on RT, we utilized the powerful developmental systems available in *Drosophila*  
28 *melanogaster*. We generated and compared RT profiles from mitotic cells of different tissues and  
29 from mitotic and endocycling cells of the same tissue. Our results demonstrate that cell lineage has  
30 the largest effect on RT, whereas switching from a mitotic to an endoreplicative cell cycle has little  
31 to no effect on RT. Additionally, we demonstrate that the RT differences we observed in all cases  
32 are largely independent of transcriptional differences. We also employed a genetic approach in  
33 these same cell types to understand the relative contribution the eukaryotic RT control factor, Rif1,  
34 has on RT control. Our results demonstrate that Rif1 can function in a tissue-specific manner to  
35 control RT. Importantly, the Protein Phosphatase 1 (PP1) binding motif of Rif1 is essential for  
36 Rif1 to regulate RT. Together, our data support a model in which the RT program is primarily  
37 driven by cell lineage and is further refined by Rif1/PP1 to ultimately generate tissue-specific RT  
38 programs.

## 39 **Introduction**

40 DNA replication initiates from discrete regions of the eukaryotic genome, known as  
41 replication domains, in a precise chronological manner during S phase. This temporal order of  
42 DNA replication is known as the DNA replication timing (RT) program and is evolutionarily  
43 conserved from yeast to humans (Rivera-Mulia and Gilbert 2016). In metazoan species, replication  
44 domain sizes range from hundreds of kilobases to megabases, and their RT is correlated with  
45 transcriptional activity, chromatin structure, and position within the nucleus (MacAlpine et al.  
46 2004; Schwaiger et al. 2009; Eaton et al. 2011; Rivera-Mulia and Gilbert 2016; Almeida et al.  
47 2018). Furthermore, RT domains are highly correlated with topologically associated domains  
48 (TADs), where a near one-to-one correlation has been observed between RT domains and TADs  
49 (Pope et al. 2014). While RT is clearly influenced by chromatin structure and nuclear organization,  
50 the exact function of RT is not fully understood. Importantly, defects in RT are associated with  
51 genome instability, and RT is often altered in cancer cells (Stamatoyannopoulos et al. 2009; Koren  
52 et al. 2012; Donley and Thayer 2013). Therefore, understanding the processes and factors that  
53 contribute to RT is key to understanding fundamental aspects of eukaryotic DNA replication and  
54 genome stability.

55 Both cellular differentiation and cellular identity influence genome-wide RT, suggesting  
56 that the underlying mechanisms regulating RT are plastic during development. Comparison of  
57 genome-wide RT between three lines of cultured *Drosophila* cells revealed differences in RT  
58 across ~8% of the genome (Lubelsky et al. 2014). More extensive RT profiling using *in vitro*  
59 models of cellular differentiation from multiple mammalian cell lineages has revealed ~50% of  
60 the genome is subject to cell-type specific RT changes (Hiratani et al. 2008; Hiratani et al. 2010).  
61 Furthermore, in mammalian cells, the RT program goes through a global reorganization where

62 many small RT domains consolidate into larger RT domains as cells differentiate from embryonic  
63 stem cells to more differentiated cell types (Ryba et al. 2010). It is still unclear, however, whether  
64 cell-type specific changes in RT are developmentally programmed directly or whether differential  
65 RT is a passive reflection of the changes in chromatin structure and nuclear organization that occur  
66 during cellular differentiation.

67 Multiple *trans*-acting replication factors control RT from yeast to humans. Loading of the  
68 MCM replicative helicase during G1 phase of the cell division cycle and helicase activation during  
69 S phase are key steps in RT control (Bell and Stillman 1992; MacAlpine et al. 2010; Mantiero et  
70 al. 2011; Collart et al. 2013; Miotto et al. 2016). Several factors are limiting for replication  
71 initiation (Sld2, Sld3, Dpb11, Dbf4 and Cdc45) and their overexpression disrupts RT in budding  
72 yeast and *Xenopus* (Mantiero et al. 2011; Collart et al. 2013). A critical *trans*-acting RT-regulating  
73 factor is Rif1 (Rap1-interacting factor 1), which controls RT from yeasts to humans (Cornacchia  
74 et al. 2012; Hayano et al. 2012; Yamazaki et al. 2012; Peace et al. 2014; Foti et al. 2016). In  
75 animals, it is not clear whether the genomic regions that Rif1 targets during differentiation are cell-  
76 type specific or whether Rif1 selectively regulates specific regions of the genome regardless of  
77 cell type. Although Rif1 is only modestly conserved, all Rif1 orthologs contain a Protein  
78 Phosphatase 1 (PP1)-interaction motif, suggesting that PP1 recruitment is a critical function of  
79 Rif1. Rif1-dependent recruitment of PP1 to chromatin may prevent the Dbf4-dependent kinase  
80 (DDK) activation of loaded helicases (Davé et al. 2014; Hiraga et al. 2014; Mattarocci et al. 2014;  
81 Hiraga et al. 2017; Sukackaite et al. 2017). How loss of the Rif1-PP1 interaction affects RT  
82 genome wide, however, has not been determined.

83 To better understand the extent to which Rif1 regulates RT in various unperturbed cell  
84 types during development, we have measured RT in the *Drosophila* larval wing discs and adult

85 ovarian follicle cells in the presence and absence of Rif1. Here, we identify regions of the genome  
86 that change RT as a function of cell lineage and determine Rif1-dependent changes in RT in  
87 different tissue types. We found that cell lineage is a major driver of RT and demonstrate that  
88 tissue-specific transcription is not a major contributor to tissue-specific RT. Importantly, although  
89 RT in a subset of the genome depends on Rif1 similarly in different tissues, Rif1 acts in a tissue-  
90 specific manner to control RT. Additionally, the Rif1-PP1 interaction motif is required for Rif1-  
91 dependent control of RT, suggesting that PP1 recruitment to replicative helicases is the  
92 predominant mechanism Rif1 utilizes for RT control.

## 93 **Results**

### 94 **Cell lineage is a major driver of DNA replication timing**

95 To analyze RT in unperturbed cell types and tissues without the need to immortalize or  
96 transform cells, we exploited the well-characterized developmental systems of *Drosophila*  
97 *melanogaster*. To determine how cell lineage affects RT, we generated genome-wide RT profiles  
98 from cells of two distinct *D. melanogaster* epithelial tissues: third-instar larval wing imaginal disc  
99 cells and follicle cells from female adult ovaries. Cells of the wing disc are derived from the  
100 embryonic mesoderm while ovarian follicle cells are derived from the embryonic ectoderm. To  
101 generate RT profiles, we used fluorescence-activated cell sorting (FACS) to isolate and  
102 subsequently sequence the genomes of S phase nuclei from each tissue and compared these data  
103 to those obtained from G1 phase nuclei from wing discs (Figure 1A; (Armstrong et al. 2018)). The  
104 premise of this method is that early-replicating DNA sequences are over-represented relative to  
105 late-replicating sequences within the S phase population. Therefore, replication timing values can  
106 be quantified by determining  $\log_2$  transformed S/G1 read counts across the genome, where larger  
107 values indicate earlier replication and smaller values indicate later replication (Figure 1A).

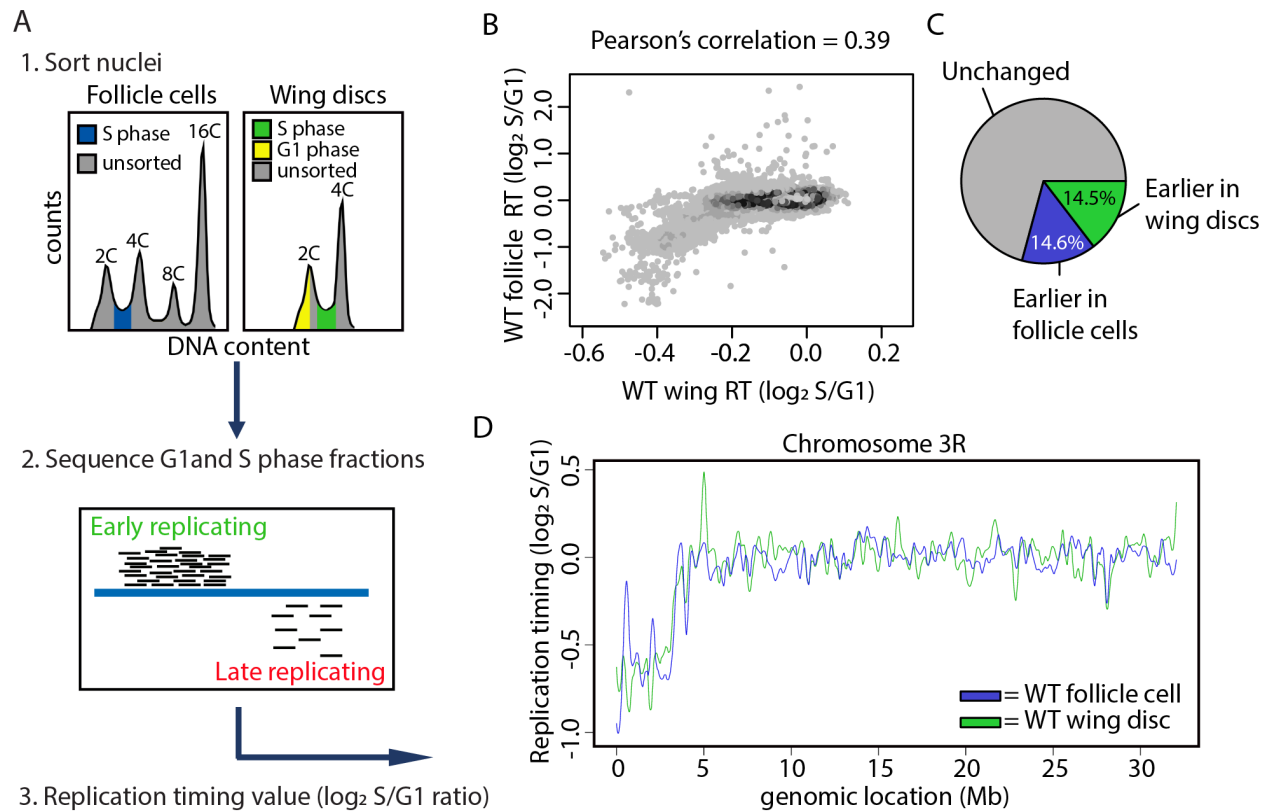

108

109 **Figure 1. Cell lineage is a major driver of DNA replication timing in *Drosophila*.** **A)**  
 110 Experimental outline: (1) Nuclei were FACS sorted into G1 (yellow) and S (blue or green)  
 111 populations based on DNA content. (2) DNA was sequenced and mapped back to the dm6  
 112 reference genome. More reads map to early than late replicating sequences. (3) S/G1  $\log_2$  ratio of  
 113 mapped reads generates replication timing profiles. **B)** Heatscatter plot of wildtype wing disc and  
 114 wildtype follicle cell S/G1 ( $\log_2$ ) ratios at all 100kb windows using a 10kb slide across the genome.  
 115 **C)** Pie chart of all 100kb windows of significantly earlier RT in wildtype wing discs (green),  
 116 significantly earlier RT in wildtype follicle cells (blue), and unchanged RT (grey) across the major  
 117 chromosome scaffolds. **D)** LOESS regression lines showing average wildtype wing disc (green)  
 118 and wildtype follicle cell (blue) S/G1 ( $\log_2$ ) replication timing values across the chromosome 3R  
 119 scaffold. See Figure S1 for all other chromosome arms.

120

121

122

123

124

125

To determine how lineage contributes to RT, we generated RT values at 100kb windows  
 tiled at 10kb intervals across the genome for both wing discs and follicle cells and used a stringent  
 significance threshold to identify differential RT between each tissue (Materials and Methods;  
 (Armstrong et al. 2018)). RT profiles generated from individual replicates of wildtype wing discs  
 and follicle cells were strongly correlated (Pearson's correlations = 0.95 and 0.95, respectively;  
 Figure S1A), whereas RT values between the two lineages were significantly more divergent

126 (Pearson's correlation = 0.39; Figure 1B). While ~70% of the genome has similar RT between the  
127 two tissues, ~29% of the genome displays tissue-specific RT where 14.6% of windows replicate  
128 earlier in follicle cells and 14.5% of windows replicate earlier in wing discs (Figure 1C,D; Figure  
129 S1B; Table S1). Gene ontology analysis of genes located within tissue-specific RT domains did  
130 not reveal a significant enrichment of genes associated with a specific biological process.  
131 Furthermore, differential RT between wing discs and follicle cells did not preferentially affect any  
132 one chromatin state (Kharchenko et al. 2011), and replication domain sizes were highly similar  
133 between the two tissues (Figure S1C,D). These data demonstrate that cell lineage is a key  
134 contributor to replication timing control in *Drosophila* similar to what has been previously  
135 observed in mammalian cell culture systems (Hiratani et al. 2008; Ryba et al. 2010; Rivera-Mulia  
136 et al. 2015).

### 137 **Cell type-specific transcription does not drive changes in RT**

138 Transcriptional activity is highly correlated with RT, with early replicating regions of the  
139 genome associated with active transcription and late replicating regions associated with  
140 transcriptional repression (MacAlpine et al. 2004; Liu et al. 2012; Lubelsky et al. 2014; Rivera-  
141 Mulia and Gilbert 2016). Therefore, we determined if differences in transcriptional activity are  
142 correlated with differential RT. We generated transcriptomes from wildtype wing disc cells and  
143 follicle cells by total RNA-seq and identified differentially expressed transcripts between each  
144 tissue type. Individual biological replicates were highly correlated (Figure S2; Pearson's  
145 correlation coefficients > 0.95) and we were able to identify tissue-specific gene expression  
146 including *wingless* (*wg*) expression in wing discs and *chorion protein* (*cp*) expression in follicle  
147 cells (Figure S3A). We observed 3,994 differentially expressed transcripts ( $p < 0.01$ ; edgeR)

148 between the two tissues (Figure 2A), with elevated expression of 2,651 transcripts in wing discs  
 149 and 1,343 transcripts in follicle cells (Figure 2A).

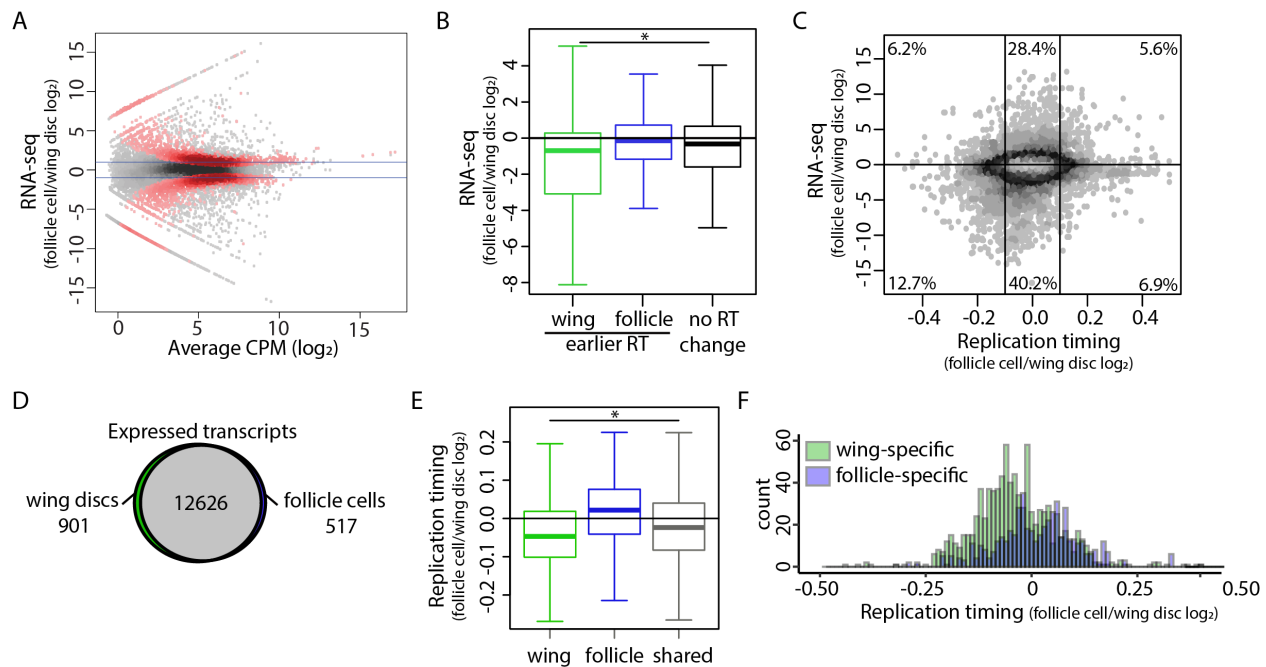

150

151 **Figure 2. Tissue-specific transcription does not drive changes in RT.** **A)** Heatscatter plot of the  
 152 wildtype follicle cell/wildtype wing disc ratio of total RNA-seq signal. Statistically different  
 153 transcripts between wildtype follicle cells and wildtype wing discs are indicated in red ( $p < 0.01$ ;  
 154 edgeR). Blue lines indicate a log<sub>2</sub> fold change of 1 and -1. **B)** The average log<sub>2</sub> fold change of all  
 155 transcripts within each 10kb window of earlier RT in wildtype wing discs (green), earlier RT in  
 156 wildtype follicle cells (blue), and unchanged RT (grey). Only windows containing at least one  
 157 transcript are shown. ( $p < 0.0001$ ; One way ANOVA). **C)** Heatscatter plot of the wildtype follicle  
 158 cell/wildtype wing disc RT values (S/G1 (log<sub>2</sub>)) versus the wildtype follicle cell/wildtype wing  
 159 disc ratio of normalized RNA-seq signal at all 10kb windows across the major chromosome  
 160 scaffolds. The average log<sub>2</sub> fold change of all transcripts within each 10kb window is plotted, and  
 161 only windows containing at least one transcript are shown. Percentages represent the number of  
 162 windows within each region (vertical lines at -0.1 and 0.1 represent log<sub>2</sub> fold change cutoffs for  
 163 RT statistical significance). **D)** Venn diagram comparing expressed transcripts (TPM > 0) between  
 164 wildtype wing discs and wild type follicle cells. Wing-specific (green), follicle-specific (blue) and  
 165 shared (grey) transcripts are indicated. **E)** Log<sub>2</sub> fold change of RT values between wildtype follicle  
 166 cells and wildtype wing discs at wing-specific (green), follicle-specific (blue), and shared (black)  
 167 transcripts ( $p < 0.0001$ ; One way ANOVA). **F)** Histogram of replication timing log<sub>2</sub> fold change  
 168 of wing-specific (green) and follicle-specific (blue) transcripts.

169 To identify whether tissue-specific RT is driven by tissue-specific gene expression between

170 wing discs and follicle cells, we directly compared differences in RT and gene expression at 10kb



171 windows across the genome between the two tissues. First, we compared the average change in  
172 abundance of all transcripts within each window to the RT change of that window (Materials and  
173 Methods). Although transcript abundance was modestly elevated in wing discs versus follicle cells  
174 at windows of earlier RT in wing discs (average  $\log_2$  fold change = 1.45CPM), we did not observe  
175 a strong correlation between elevated gene expression and earlier RT in follicle cells (Figure 2B,C;  
176 Figure S3B). These results were consistent whether we considered 1) the average change in the  
177 abundance of all transcripts overlapping each 10kb window (Figure 2B,C; Figure S3B), 2) the  
178 change of the most confident transcript (lowest p value) assigned to each window (Figure S3C),  
179 or 3) the change of the transcript with the greatest differential expression (absolute maximum  $\log_2$   
180 fold-change) assigned to each window (Figure S3D). Furthermore, 47.4% (791/1670) and 73.4%  
181 (813/1107) of windows with earlier RT in wing discs or follicle cells, respectively, do not contain  
182 a transcript with a significant increase in gene expression (Figure S3E), suggesting that tissue-  
183 specific RT and tissue-specific gene expression are mechanistically separable. Therefore, we  
184 conclude that differential gene expression between wing discs and follicle cells does not fully  
185 explain differences in RT between these two tissues.

186 As an independent method to assess the relationship between tissue-specific gene  
187 expression and RT, we identified genes expressed in both tissues (shared), genes expressed in wing  
188 discs only (wing-specific), and genes expressed in follicle cells only (follicle-specific) (Materials  
189 and Methods). We identified 12,626 genes that were expressed in both tissues, 901 genes that were  
190 wing-specific, and 517 that were follicle-specific (Figure 2D). When we quantified differential RT  
191 at both shared genes and tissue-specific genes, we observe earlier replication of wing-specific and  
192 shared genes in wing discs whereas follicle-specific genes do not replicate earlier in follicle cells  
193 (Figure 2E,F). These data again indicate that tissue-specific transcription and tissue-specific RT,

194 although correlated, are separable. We hypothesized that earlier replication of shared genes in wing  
195 discs would correlate with elevated gene expression genome-wide in wing discs relative to follicle  
196 cells. Direct comparison of gene expression between the two tissues revealed a global increase of  
197 transcript abundance in wing discs relative to follicle cells (Figure S3F,G). Together, these data  
198 demonstrate that while gene expression and RT are correlated genome-wide (Figure S3H,I),  
199 changes in gene expression do not direct changes in RT between wing discs and follicle cells  
200 suggesting that RT and transcriptional activity are mechanistically separable.

201 **The mitotic-to endocycle transition does not affect DNA replication timing in follicle cells**

202 The follicle cells of the adult ovary undergo a developmentally programmed cell cycle  
203 transition in which, after a series of mitotic divisions, they begin endocycling, a cell cycle  
204 consisting of S and G phases with no intervening mitoses (Figure 3A) (Edgar and Orr-Weaver  
205 2001; Fox and Duronio 2013; Edgar et al. 2014). Follicle cells undergo three endocycles, resulting  
206 in a ploidy of 16C. Previous work has shown that there are distinct changes in genome regulation  
207 during the endocycle, including a global decrease in transcription, decrease in E2F1 target gene  
208 expression, and acquisition of endocycle-specific ORC binding sites (Maqbool et al. 2010; Sher et  
209 al. 2012; Hua et al. 2018; Rotelli et al. 2019). Therefore, we hypothesized that follicle cell  
210 replication timing may be influenced by this developmentally regulated cell cycle transition.

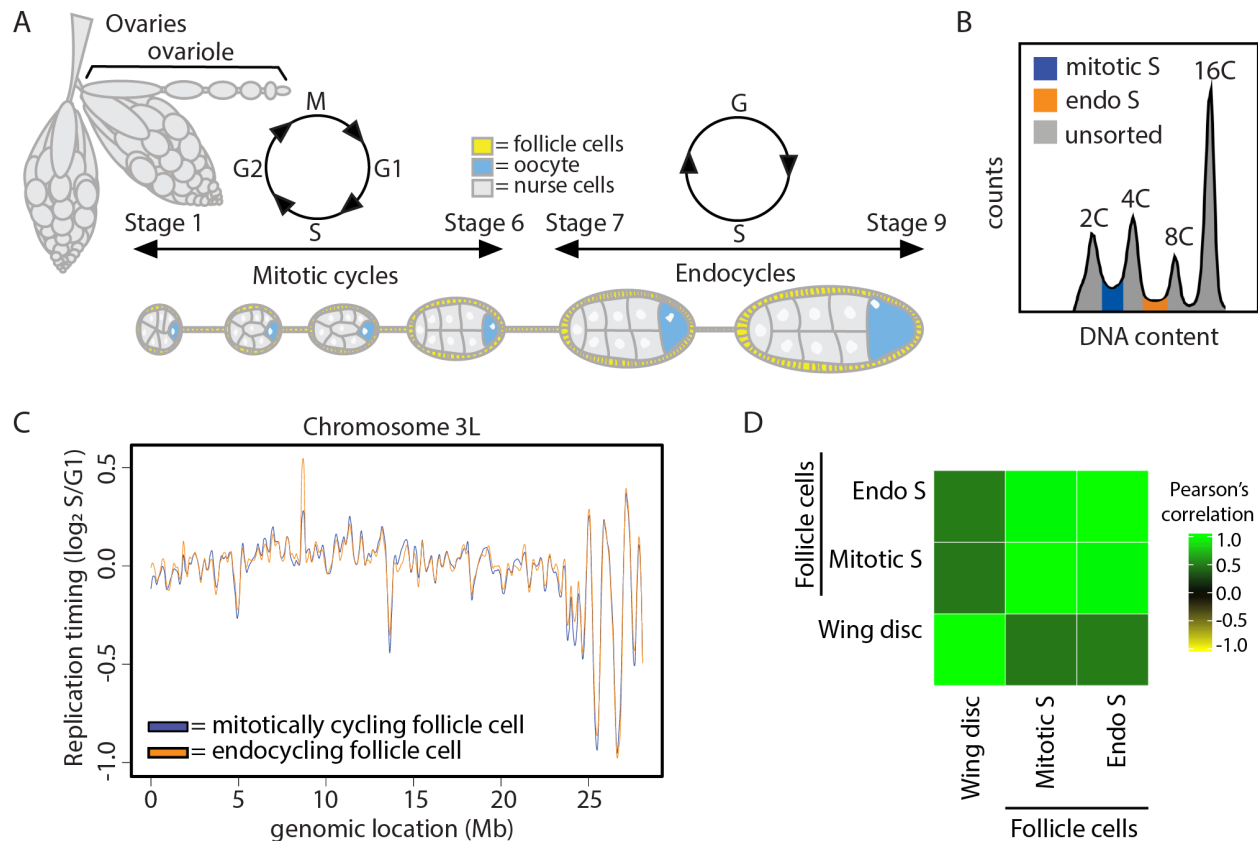

211

212 **Figure 3. The mitotic to endocycle transition does not affect DNA replication timing within**  
 213 **the follicle cells of the adult ovary. A)** Early egg chamber development within the adult  
 214 *Drosophila* ovary. **B)** Representative FACS profile of follicle cell nuclei isolated from whole  
 215 ovaries. The 2C-4C S phase fraction (blue) are the mitotically cycling follicle cells, and the 4C-  
 216 8C S phase fraction (orange) are the endocycling follicle cells. **C)** LOESS regression line showing  
 217 average wildtype mitotically cycling follicle cells (blue) and wildtype endocycling follicle cells  
 218 (orange) S/G1 ( $\log_2$ ) replication timing values in at across the chromosome 3L scaffold. See Figure  
 219 S4 for all other chromosome arms. **D)** Correlation matrix of S/G1 ( $\log_2$ ) replication timing values  
 220 for wildtype endocycling follicle cells (endo S), wildtype mitotically cycling follicle cells (mitotic  
 221 S), and wild type wing discs.

222 To determine if the transition from a mitotic cycle to an endocycle causes a change in RT,  
 223 we generated genome-wide replication timing profiles from wildtype endocycling follicle cells  
 224 and compared them to the RT profiles we measured from wildtype mitotic follicle cells (Figure  
 225 S4A,B). To this end, we collected the S phase populations between the 2C and 4C peaks (mitotic)  
 226 and between the 4C and 8C peaks, which corresponds to the second of the three endocycles (Figure  
 227 3B). Direct comparison of RT profiles generated from wildtype mitotic (2C-4C) and endocycling

228 (4C-8C) follicle cells showed no windows of differential RT genome-wide between the two  
229 populations of follicle cells (Figure 3C,D; Figure S4C; Table S1). Likewise, the gene expression  
230 profiles of these two populations of follicle cells were highly similar, with only six differentially  
231 expressed transcripts between mitotically cycling and endocycling follicle cells ( $p < 0.01$ , edgeR;  
232 Figure S2; Figure S4D). It is important to note that the first follicle cell endocycle likely initiates  
233 from G1 phase (Lilly and Spradling 1996; Calvi et al. 1998); therefore, the mitotic S phase sample  
234 may contain both mitotic and endocycling follicle cells. We were concerned that the impure cell  
235 population in the mitotic follicle cell dataset might mask any differential RT between the mitotic  
236 and endocycling populations. Based on the number of follicle cells in a mature egg chamber  
237 (~1000), we estimate that follicle cells in the first endo S phase could account for, at most, one  
238 half of the ‘mitotic’ follicle cell population (2C-4C) (Materials and Methods). Therefore, we  
239 performed an *in silico* false discovery rate (FDR) analysis by spiking in random reads from the  
240 wing disc RT dataset into the mitotic follicle cell RT dataset. Given that the endocycling follicle  
241 cells contribute no more than 50% of our total mitotic follicle cell population, we find that our  
242 analysis would be sensitive enough to accurately identify at least ~27% of the endocycle-specific  
243 RT differences (Figure S4E; Materials and Methods). Thus, endocycling S phase cells in the 2C-  
244 4C population do not mask a difference in RT between endocycling and mitotic follicle cells.  
245 Although we cannot exclude the possibility that minor changes in RT could be masked in in our  
246 data, we conclude that mitotic and endocycling follicle cells have remarkably similar RT profiles,  
247 arguing that cell lineage, not changes in the cell cycle, is a major contributing factor to RT.

#### 248 **Rif1 fine tunes the replication timing program in different tissues**

249 Rif1 is a global regulator of DNA RT from yeast to humans (Cornacchia et al. 2012;  
250 Hayano et al. 2012; Yamazaki et al. 2012; Peace et al. 2014; Seller and O’Farrell 2018). We sought

251 to determine whether *Rif1* regulates RT in a tissue-specific manner or whether *Rif1*-dependent RT  
252 domains are hardwired into the genome. To address these questions, we generated genome-wide  
253 RT profiles from mitotic follicle cells and wing discs in a *Rif1* null (*Rif1*<sup>-</sup>) mutant previously  
254 generated by our lab (Figure S5A,B; (Munden et al. 2018)). Individual replicates of *Rif1*<sup>-</sup> RT data  
255 generated from either wing discs or follicle cells correlated well (Figure S5C; Figure S6A),  
256 whereas comparison of *Rif1*<sup>-</sup> and wildtype RT data revealed that approximately 13% of the genome  
257 has differential RT in mitotically cycling follicle cells and 8% of the genome has differential RT  
258 in wing discs (Pearson's correlation coefficient = 0.52 and 0.78, respectively; Figure S6B; Figure  
259 S5D). For the *Rif1*<sup>-</sup> mutant follicle cells, 8.2% of windows displayed advanced RT while 5.0% of  
260 windows had delayed RT (Figure 4A-C; Figure S6C; Table S1). In the *Rif1*<sup>-</sup> mutant wing disc,  
261 4.1% of windows had advanced RT and 3.9% of windows had delayed RT (Figure 4A-C; Figure  
262 S5E; Table S1). Furthermore, the magnitude of RT changes within windows of differential RT  
263 between *Rif1*<sup>-</sup> and wildtype was significantly greater in follicle cells than that observed in wing  
264 discs (Figure 4B,D). These data show that *Rif1* has a greater impact on RT in follicle cells than  
265 wing discs, arguing that *Rif1*-dependent RT domains are not hardwired into the genome.

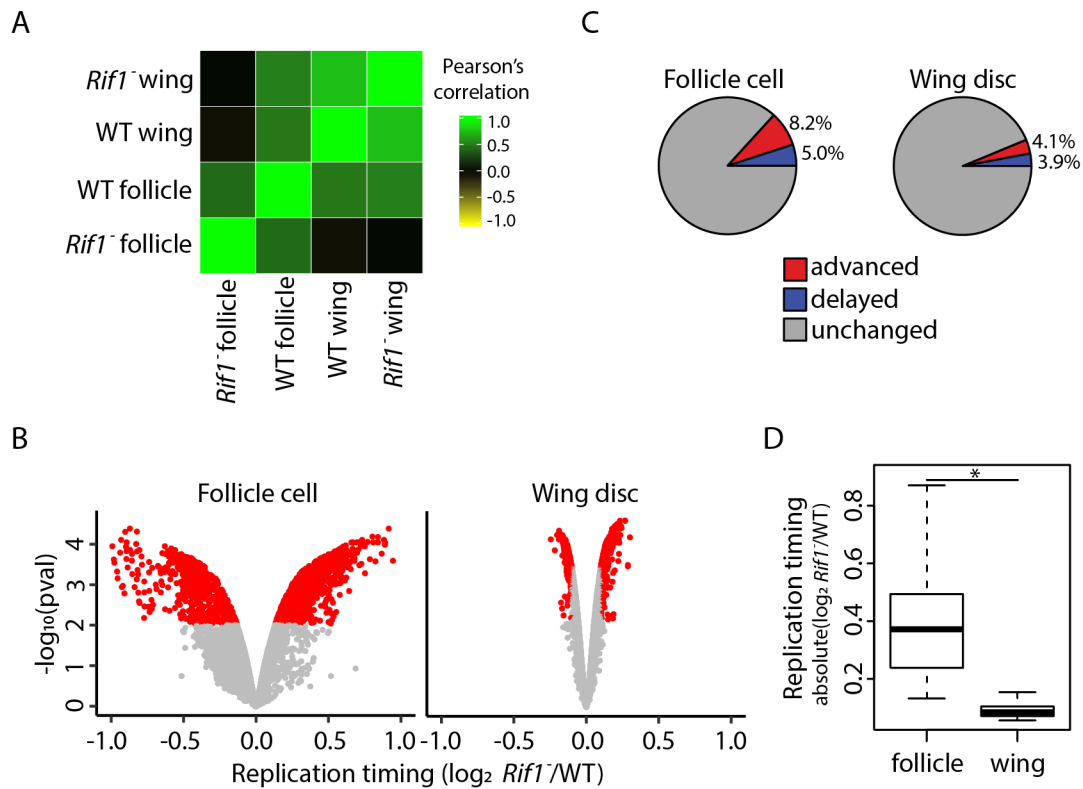

266

267 **Figure 4. Rif1 regulates RT in a lineage-specific manner.** **A)** Correlation matrix of S/G1 ( $\log_2$ )  
 268 replication timing values for wildtype mitotically cycling follicle cells (WT follicle), *Rif1*<sup>-</sup>  
 269 mitotically cycling follicle cells (*Rif1*<sup>-</sup> follicle), wildtype wing discs (WT wing), and *Rif1*<sup>-</sup> wing  
 270 discs (*Rif1*<sup>-</sup> wing). **B)** Volcano plot of the *Rif1*<sup>-</sup>/control ratio of normalized replication timing  
 271 values (S/G1 ( $\log_2$ )) plotted versus the  $-\log_{10}$  p value (adjusted for multiple testing) in follicle cells  
 272 (left) and wing discs (right). Significant replication timing changes are indicated (red;  $p < 0.01$ ,  
 273 absolute  $\log_2$  fold change  $> 0.1$ ; limma). **C)** Pie chart of all 100kb windows of significantly  
 274 advanced RT (red), significantly delayed RT (blue), and unchanged RT (grey) across the major  
 275 chromosome scaffolds in *Rif1*<sup>-</sup> mutants relative to wildtype control in follicle cells (left) and wing  
 276 discs (right) **D)** S/G1 ( $\log_2$ ) absolute  $\log_2$  fold change at 100kb windows of significant RT change  
 277 between *Rif1*<sup>-</sup> and control in follicle cells and wing discs (Student's t test,  $p < 2.2 \times 10^{-16}$ ).

278

279 Rif1 promotes late replication likely by preventing replicative helicase activation (Hayano

280 et al. 2012; Davé et al. 2014; Hiraga et al. 2014; Mattarocci et al. 2014; Hiraga et al. 2017).

281 Therefore, we hypothesized that advanced RT in a *Rif1*<sup>-</sup> mutant is a direct effect of loss of Rif1

282 function, whereas delayed RT in a *Rif1*<sup>-</sup> mutant is a secondary effect. This hypothesis predicts that

283 when comparing different *Rif1*<sup>-</sup> mutant cell types, there should be a greater extent of overlap

284 between regions with advanced RT (direct) than between regions with delayed RT (indirect). We  
 285 found that 43.8% (242/552) of windows with advanced RT in wing discs were also advanced in  
 286 follicle cells. In contrast, only 16.9% (89/527) of windows with delayed RT in wing discs were  
 287 also delayed in follicle cells (Figure 5A). These data support the hypothesis that advanced RT is a  
 288 direct effect of *Rif1* loss whereas delayed RT is likely a secondary effect.

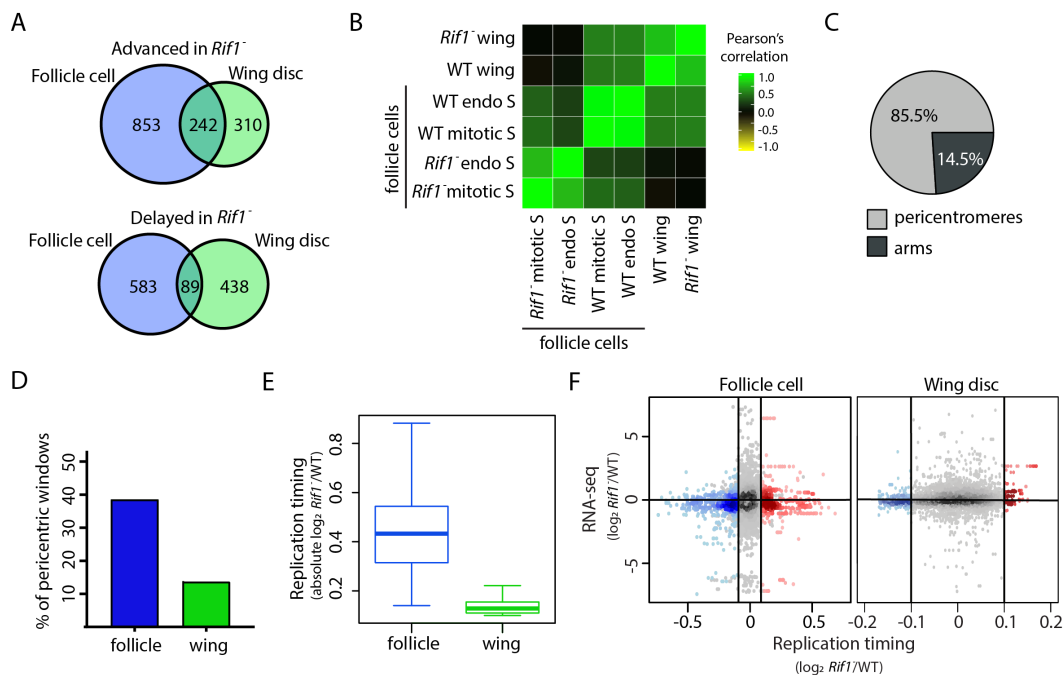

289

290 **Figure 5. *Rif1* promotes late replication of pericentric heterochromatin across lineages. A)**  
 291 Venn diagrams comparing significantly advanced (top) and delayed (bottom) 100kb windows  
 292 identified in *Rif1*<sup>-</sup> follicle cells (left; blue) and wing discs (right; green) ( $p < 0.01$  and absolute  $\log_2$   
 293 fold change  $> 0.1$ ; limma). **B)** Correlation matrix of S/G1 ( $\log_2$ ) replication timing values for  
 294 wildtype mitotically cycling follicle cells (WT mitotic S), *Rif1*<sup>-</sup> mitotically cycling follicle cells  
 295 (*Rif1*<sup>-</sup> mitotic S), wildtype endocycling follicle cells (WT endo S), *Rif1*<sup>-</sup> mitotically cycling follicle  
 296 cells (*Rif1*<sup>-</sup> endo S), wild type wing discs (WT wing), and *Rif1*<sup>-</sup> wing discs (*Rif1*<sup>-</sup> wing). **C)** Pie  
 297 chart of all 100kb windows of commonly advanced RT between *Rif1*<sup>-</sup> wing discs and follicle cells.  
 298 Windows within pericentromeres are in grey and chromosome arms are in black. **D)** Bar plot of  
 299 the percentage of 100kb windows in pericentric heterochromatin with significantly advanced RT.  
 300 **E)** S/G1 ( $\log_2$ ) absolute  $\log_2$  fold change at all 100kb windows located in pericentric  
 301 heterochromatin between *Rif1*<sup>-</sup> and control (Student's t test,  $p < 2.2 \times 10^{-16}$ ). **F)** Heatscatter plot of  
 302 the *Rif1*<sup>-</sup>/control ratio of normalized replication timing values (S/G1 ( $\log_2$ )) plotted versus the *Rif1*<sup>-</sup>  
 303 /control ratio of the most confident transcript (lowest p value) at each window across the major



304 chromosome scaffolds. Significantly advanced (red) and delayed (blue) windows are indicated (p  
305 < 0.05, absolute log<sub>2</sub> fold change > 0.1 (vertical lines); limma).

306 While measuring RT values for *Rifl*<sup>-</sup> mutant and control samples, we profiled *Rifl*<sup>-/+</sup>  
307 heterozygous follicle cells (Figure S7A,B). To our surprise, this heterozygous genotype displayed  
308 an intermediate RT phenotype with 3.6% (478/13391) of windows with advanced RT and 1.6% of  
309 windows with delayed RT relative to wildtype follicle cells (Figure S7C). Furthermore, 87.0% of  
310 windows with significantly advanced and 57.5% with significantly delayed RT in *Rifl*<sup>-</sup>  
311 heterozygotes were also affected in *Rifl*<sup>-</sup> follicle cells, indicating dependency on Rif1 function  
312 (Figure S7D). These data demonstrate that *Rifl* is haploinsufficient for RT control.

313 As an independent metric to address the specificity of commonly advanced and/or delayed  
314 RT changes, we asked whether common RT changes between mitotic follicle cells and wing discs  
315 were also detected in *Rifl*<sup>-</sup> endocycling follicle cells. We generated RT profiles from *Rifl*<sup>-</sup>  
316 endocycling follicle cells and found that individual replicates of RT data correlated well (Figure  
317 S8A). In contrast, 14.8% of windows displayed differential RT in *Rifl*<sup>-</sup> endocycling follicle cells  
318 relative to control with 7.2% being advanced and 7.6% being delayed (Figure 5B; Figure S8B;  
319 Table S1). Although RT was similar between wildtype mitotic and endocycling follicles cells, a  
320 *Rifl* mutation affected these cell populations differently. We found that 72.1% (789/960) of  
321 advanced windows in *Rifl*<sup>-</sup> endocycling follicle cells were also advanced in *Rifl*<sup>-</sup> mitotic follicle  
322 cells, and only 37.9% (388/1024) of the windows that were delayed in *Rifl*<sup>-</sup> endocycling follicle  
323 cells were also delayed in *Rifl*<sup>-</sup> mitotic follicle cells (Figure S8C). Accordingly, the low degree of  
324 overlap between windows of delayed RT is reflected by the low genome-wide RT correlation  
325 between *Rifl*<sup>-</sup> mitotic and endocycling follicle cells (Figure 5B; Figure S8D). Interestingly, many  
326 of the regions of advanced RT changes that were in common between *Rifl*<sup>-</sup> wing discs and mitotic  
327 follicle cells were also detected in *Rifl*<sup>-</sup> endocycling follicle cells while the delayed RT changes



328 were mostly non-overlapping (72.7% (176/242) and 47.2% (42/89), respectively). Therefore,  
329 while *Rif1* regulates RT in a tissue-specific manner, *Rif1* appears to regulate RT in a core region  
330 of the genome regardless of cell type.

### 331 **Rif1 controls RT of pericentric heterochromatin**

332 Almost all commonly advanced windows in *Rif1*<sup>-</sup> mutant cell populations are located  
333 within pericentric heterochromatin, where *Rif1* is known to localize (Buonomo et al. 2009;  
334 Munden et al. 2018; Seller and O’Farrell 2018). In contrast, all but eight of the commonly delayed  
335 windows are located along euchromatic chromosome arms (Figure 5C; Figure S9A). This  
336 relationship is also true for tissue-specific RT changes in *Rif1*<sup>-</sup> wing discs and follicle cells—  
337 advancements are over-represented in pericentric heterochromatin whereas delays are over-  
338 represented along chromosome arms (Figure S9B). Collectively, these data suggest that *Rif1*  
339 directly regulates late replication and may play a significant role in regulating late replication of  
340 pericentric heterochromatin. Interestingly, almost 40% of pericentric heterochromatin advances in  
341 *Rif1*<sup>-</sup> follicle cells (both mitotically cycling and endocycling), whereas 2.8-fold fewer pericentric  
342 windows advance RT in *Rif1*<sup>-</sup> wing discs (Figure 5D; Figure S9B). Furthermore, the overall RT of  
343 *Rif1*<sup>-</sup> pericentric heterochromatin remains very late in wing discs relative to the average RT of the  
344 chromosome arms, and the magnitude of RT advancement is less than that observed in *Rif1*<sup>-</sup>  
345 pericentric heterochromatin in follicle cells (Figure 5E; Figure S5E). Therefore, *Rif1* contributes  
346 more substantially to late replication of pericentric heterochromatin in follicle cells than in wing  
347 discs.

348 Some genomic regions of *Drosophila* endocycling cells are under-replicated relative to the  
349 rest of the genome; i.e. they have reduced copy number relative to overall ploidy. This is  
350 particularly true in pericentric heterochromatin in salivary glands, and this under-replication

351 requires *Rif1* (Munden et al. 2018). Consequently, because our RT protocol measures relative copy  
352 number in S phase versus G1 phase, one possible explanation for the significantly earlier  
353 replication of pericentric heterochromatin in polyploid *Rif1<sup>-</sup>* follicle cells relative to diploid *Rif1<sup>-</sup>*  
354 wing discs is a loss of under-replication of pericentric heterochromatin. Multiple observations,  
355 however, indicate that we are measuring true changes in RT rather than the loss of under-  
356 replication in *Rif1<sup>-</sup>* follicle cells. First, loss of under-replication predicts that 100% of pericentric  
357 heterochromatin would be scored as “advanced” RT. However, we found that only 40% of  
358 pericentric heterochromatin advances RT in *Rif1<sup>-</sup>* mitotic and endocycling follicle cells (Figure  
359 5D; Figure S8B). Second, if pericentric heterochromatin was under-replicated in wild type  
360 endocycling follicle cells, we would expect to observe a reduced copy number in pericentric  
361 heterochromatin relative to wildtype mitotically cycling follicle cells. However, pericentric  
362 heterochromatin copy number profiles derived from wildtype mitotic and endocycling S phase  
363 fractions are not different from one another (Figure S10). Together, these data support the  
364 conclusion that *Rif1* regulates RT uniquely in different cell types and that the RT differences  
365 measured in *Rif1<sup>-</sup>* follicle cells represent changes in RT and do not result from changes in under-  
366 replication.

### 367 **Rif1 controls RT independently of gene expression**

368 To determine whether RT changes in *Rif1<sup>-</sup>* wing discs and follicle cells were due to  
369 transcriptional deregulation, we generated transcriptomes from *Rif1<sup>-</sup>* follicle cells and *Rif1<sup>-</sup>* wing  
370 discs. We identified only 121 and 60 differentially expressed transcripts between *Rif1<sup>-</sup>* and controls  
371 in wing discs and mitotic follicle cells, respectively, demonstrating that gene expression is largely  
372 unaffected after loss of *Rif1* function (Figure S6D). We found only 2.1% (28/1342) of differential  
373 RT windows in follicle cells and 19.5% (99/507) of differential RT windows in wing discs contain

374 at least one differentially expressed transcript (Figure 5F). Together, these data show that while  
375 loss of Rif1 function affects RT to a greater extent in follicle cells relative to wing discs, these RT  
376 changes likely do not result from transcriptional deregulation.

### 377 **Rif1's PP1 binding motif is essential for Rif1-mediated RT control**

378 Rif1 impacts the RT of pericentric heterochromatin to a greater extent in follicle cells than  
379 in wing discs (Figure 5D,E), suggesting a different requirement for Rif1 in RT regulation of  
380 pericentric heterochromatin in different tissues. To further understand these mechanistic  
381 differences, we assessed what role the PP1 binding motif within Rif1 has on RT control of  
382 pericentric heterochromatin in wing discs and follicle cells. Rif1 orthologs from yeasts to humans  
383 contain a PP1 binding motif, and mutation of this motif prevents Rif1 association with PP1 in  
384 multiple systems ((Davé et al. 2014; Hiraga et al. 2014; Mattarocci et al. 2014; Sreesankar et al.  
385 2015; Alver et al. 2017; Hiraga et al. 2017; Sukackaite et al. 2017)). We previously generated an  
386 allele of Rif1 (*Rif1<sup>PP1</sup>*) where the conserved SILK/RSVF PP1 interaction motif is mutated to  
387 SAAK/RASA (Munden et al. 2018). We generated genome-wide RT profiles from *Rif1<sup>PP1</sup>* wing  
388 discs and follicle cells. Individual replicates from each tissue correlated well (Pearson's correlation  
389 = 0.91 and 0.89; Figure S11A,B; Figure S12A,B). In contrast, we found that 17.9% and 11% of  
390 windows in *Rif1<sup>PP1</sup>* wing discs and follicle cells, respectively, displayed differential RT relative to  
391 control (Figure 6A,B; Figure S11C,D; Figure S12C,D; Table S1). Strikingly, *Rif1<sup>PP1</sup>* wing discs  
392 displayed over 3-fold the number of advanced windows compared to *Rif1<sup>-</sup>* wing discs. In addition,  
393 almost all (94.4%) advanced windows in *Rif1<sup>-</sup>* wing discs were also advanced in *Rif1<sup>PP1</sup>* mutants  
394 (Figure 6B). Interestingly, in follicle cells, there was almost a complete overlap of advanced RT  
395 windows between *Rif1<sup>PP1</sup>* and *Rif1<sup>-</sup>* mutants. These data suggest that the *Rif1<sup>PP1</sup>* and *Rif1<sup>-</sup>* mutations  
396 potentially affect RT through different mechanisms in wing discs and through the same mechanism

397 in follicle cells. In contrast, the overlap of delayed RT changes between *Rif1<sup>PP1</sup>* and *Rif1<sup>-</sup>* wing  
 398 discs or follicle cells is poor (Figure 6B). These data further support that advanced RT in *Rif1*  
 399 mutants is a direct consequence of Rif1 loss, whereas delayed RT is likely secondary effect.

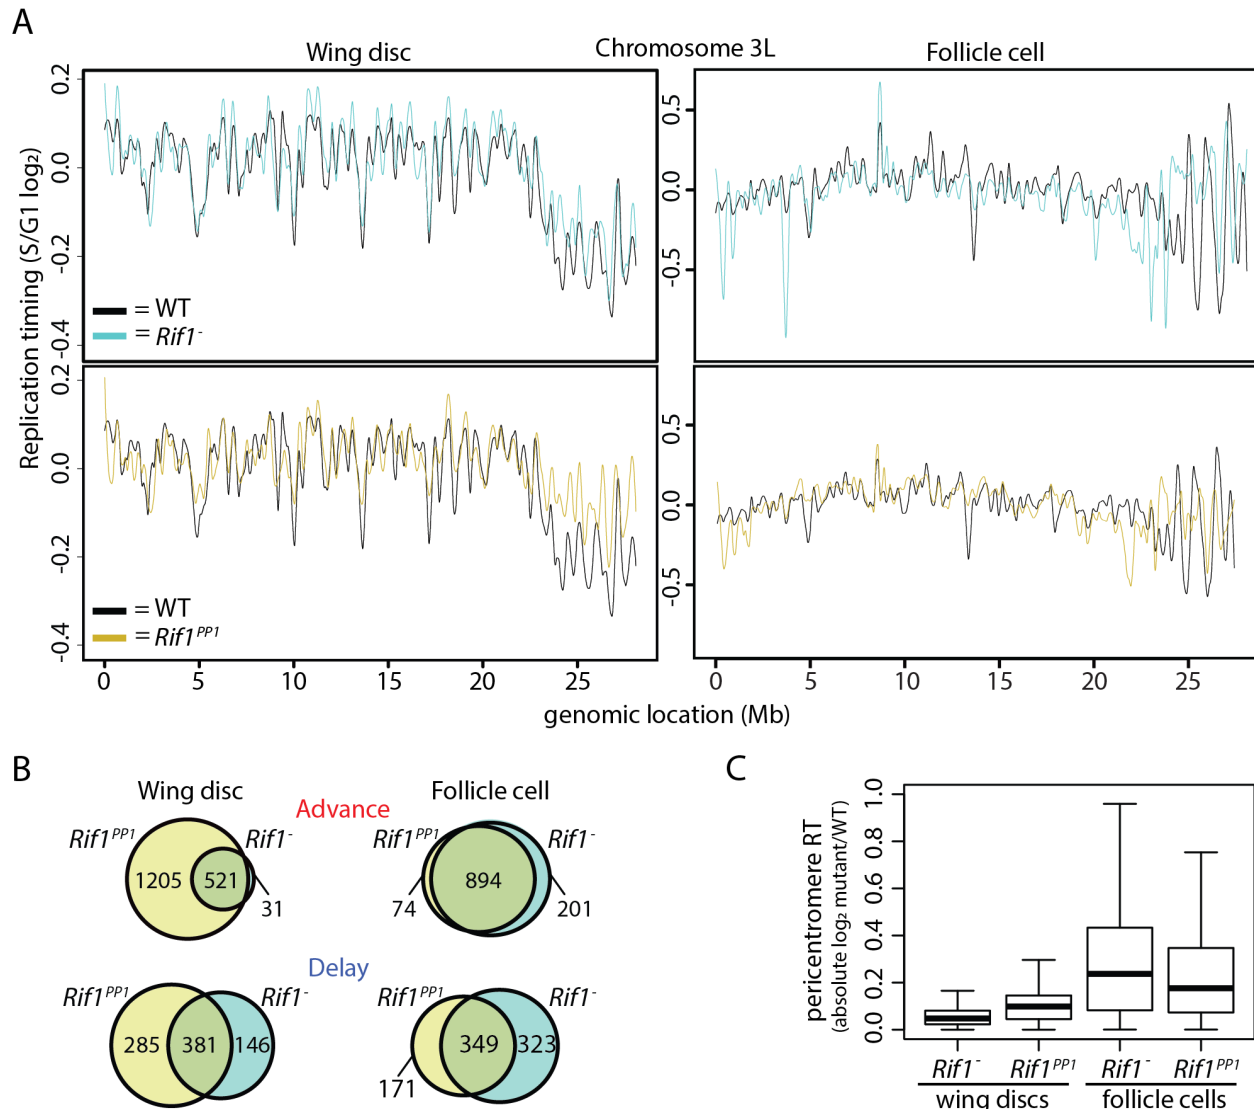

400

401

402 **Figure 6. Rif1's PP1 binding motif is essential for Rif1-mediated RT control.** **A)** LOESS  
 403 regression line showing average *Rif1<sup>-</sup>* (cyan), *Rif1<sup>PP1</sup>* (gold), and wildtype (black) S/G1 ( $\log_2$ )  
 404 replication timing values in wing discs (left) and follicle cells (right) across the chromosome 3L  
 405 scaffold. See Figures S5, S6, S11, and S12 for other chromosomes. **B)** Venn diagrams comparing  
 406 significantly advanced (top) and delayed (bottom) 100kb windows identified in *Rif1<sup>-</sup>* (cyan) and  
 407 *Rif1<sup>PP1</sup>* (gold) wing discs (left) and follicle cells (right) ( $p < 0.01$  and absolute  $\log_2$  fold change >

408 0.1; limma). C) Box plot of absolute mutant/control log<sub>2</sub> ratio of normalized replication timing  
409 values (S/G1 (log<sub>2</sub>)) at all pericentromeric regions of the major chromosome scaffolds.

410 As Rif1 affects RT of pericentric heterochromatin in both tissues, we hypothesized that RT  
411 changes in *Rif1<sup>PP1</sup>* tissues would preferentially be located at pericentromeres. We found that  
412 approximately 48% of pericentric heterochromatin displayed a significant advancement of RT in  
413 *Rif1<sup>PP1</sup>* wing discs, unlike what we found for *Rif1<sup>-</sup>* null wing discs where only ~10% of pericentric  
414 heterochromatin advanced. The *Rif1<sup>PP1</sup>* wing disc RT phenotype is more similar to what we  
415 observed at pericentric heterochromatin in *Rif1<sup>-</sup>* follicle cells (Figure 5A). Specifically, 80%  
416 (876/1095) of advanced windows in *Rif1<sup>-</sup>* mitotic follicle cells were also advanced in *Rif1<sup>PP1</sup>* wing  
417 discs (Figure S12E). Additionally, all commonly advanced windows between *Rif1<sup>-</sup>* follicle cells  
418 and wing discs were advanced in *Rif1<sup>PP1</sup>* wing discs. Interestingly, while the magnitude of RT  
419 change at pericentromeres is significantly greater in *Rif1<sup>PP1</sup>* wing discs relative to *Rif1<sup>-</sup>* wing discs  
420 ( $p < 2.2 \times 10^{-16}$ ), the magnitude of RT change in *Rif1<sup>PP1</sup>* wing discs remains significantly lower  
421 than what is observed in *Rif1<sup>-</sup>* or *Rif1<sup>PP1</sup>* follicle cells (Figure 6C). Collectively, these data  
422 demonstrate that the *Rif1<sup>PP1</sup>* mutation differentially affects pericentric heterochromatin RT relative  
423 to the *Rif1<sup>-</sup>* mutation in wing discs and suggest that regulatory mechanisms, potentially including  
424 the Rif1-PP1 interaction, function differently to regulate late RT of pericentromeres between  
425 tissues.

## 426 Discussion

427 Our findings provide insight into the relative contributions that cell type, gene expression,  
428 cell cycle, and Rif1 have on RT control. By comparing genome-wide RT profiles from unperturbed  
429 cells from distinct tissues, we demonstrated that cell lineage has a larger effect on RT than Rif1,  
430 an evolutionarily conserved regulator of RT. We also found that the RT program is not modified  
431 in response to the physiological and transcriptional changes that occur during the mitotic-to-

432 endocycle transition and that transcriptional differences between cell types do not drive changes  
433 in RT.

434 We found that ~30% of the genome had different RT in the two tissue types we examined,  
435 and that transcriptional changes do not account for these changes. Studies in other systems also  
436 have failed to establish a direct relationship between changes in RT and changes in transcriptional  
437 activity (MacAlpine et al. 2004; Lubelsky et al. 2014; Siefert et al. 2017; Almeida et al. 2018;  
438 Armstrong et al. 2018). While transcriptional activity has long been correlated with RT, there are  
439 clearly mechanisms that control RT independently of transcription. RT is highly correlated with  
440 genome topology (Pope et al. 2014), and recent work has demonstrated that changes in TAD  
441 structure can be uncoupled from changes in gene expression (Ghavi-Helm et al. 2019). Therefore,  
442 our results are consistent with a model in which lineage-specific changes in genome topology, not  
443 transcription, underlie changes to the RT program as cells differentiate. These RT programs can  
444 then further be enforced by *trans*-acting factors such as Rif1.

445 When comparing different tissues, we found a higher degree of overlap between regions of  
446 the genome that transition from late-to-early in the absence of Rif1 than those that transition from  
447 early-to-late. These data imply that Rif1 directly promotes late replication of specific regions of  
448 the genome while indirectly affecting regions of the genome that normally replicate early. It is  
449 currently unknown, however, how Rif1 is targeted to heterochromatin and other late-replicating  
450 regions of the genome to delay RT. Rif1 dynamically associates with heterochromatin from yeasts  
451 to humans (Buonomo et al. 2009; Seller and O'Farrell 2018). In early *Drosophila* embryos, Rif1  
452 is recruited to heterochromatic regions independently of HP1a, and then displaced from  
453 heterochromatin immediately before heterochromatin is replicated late in S phase (Seller and  
454 O'Farrell 2018). Chromatin immunoprecipitation of Rif1 followed by sequencing has revealed that

455 in yeast and mouse cells Rif1 targets many other regions of the genome with both late and early  
456 replicating domains (Hayano et al. 2012; Foti et al. 2016). Our results argue that Rif1 localization  
457 to chromatin is likely influenced by cell type-specific factors.

458 Our results demonstrate that in metazoans the PP1 interaction motif of Rif1 can contribute  
459 to Rif1-mediated RT control. These data suggest that helicase inactivation, or inactivation of  
460 another PP1 target near origins of replication, is critical for Rif1-mediated RT control. Multiple  
461 models have been proposed to explain how Rif1 controls RT. First, through a direct interaction  
462 with PP1, Rif1 is thought to counteract DDK-mediated helicase activation and delay replication of  
463 Rif1-associated regions (Davé et al. 2014; Hiraga et al. 2014; Alver et al. 2017). Second, based on  
464 4C experiments with five viewpoints, Rif1 was shown to affect chromatin contacts between  
465 different RT domains, suggesting that Rif1 controls RT through nuclear organization (Foti et al.  
466 2016). It is unclear how these different models are related, if at all. Furthermore, while the timing  
467 decision point occurs in G1 phase, helicase activation occurs throughout S phase, raising additional  
468 mechanistic questions about how Rif1 controls RT. Recent work in budding yeast has shown that  
469 DDK can act in G1 phase (Zhang et al. 2019). Additionally, DDK-dependent helicase activation  
470 and Cdc45 recruitment in G1 phase is critical for the specification of certain replication origins.  
471 Thus, premature helicase activation in the absence of Rif1 during G1 phase could alter the  
472 localization of specific replication domains. While this model could unify the observations  
473 describing how Rif1 controls RT, further work is needed to test this possibility.

474 Our data suggest that different regulatory mechanisms control late RT between wing discs  
475 and follicle cells. The approximately 3-fold increase in the number of windows with advanced RT  
476 in *Rif1<sup>PP1</sup>* wing discs relative to *Rif1<sup>-</sup>* null wing discs was surprising. These data indicate that the  
477 presence of mutant Rif1<sup>PP1</sup> protein results in a stronger effect than the absence of Rif1. One

478 possibility is that Rif1<sup>PP1</sup> acts in a dominant negative manner in regions of the genome that  
479 normally replicate late during S phase, such as pericentric heterochromatin. Another striking  
480 observation was that loss of Rif1 function in wing discs did not substantially advance RT in much  
481 of the pericentric heterochromatin. This result suggests that mechanisms in addition to Rif1/PP1-  
482 mediated MCM dephosphorylation act within the wing disc to promote late replication of  
483 pericentric heterochromatin.

484         In summary, our study demonstrates that cell lineage is a major driver of RT control within  
485 the context of a developing organism. Rif1 fine tunes the RT program established in different  
486 tissues, and each of these modes of RT control function independently of transcriptional control,  
487 suggesting additional levels of regulation.



## 488 **Materials and Methods**

### 489 **FACS and genomic DNA sequencing**

490 Isolated nuclei from *OregonR*, *Rif1<sup>1</sup>/Rif1<sup>2</sup> (Rif1<sup>-</sup>)*, and *Rif1<sup>PP1</sup>/Rif1<sup>1</sup> (Rif1<sup>PP1</sup>)* female adult ovaries  
491 and *yw*, *Rif1<sup>-</sup>*, and *Rif1<sup>PP1</sup>* female 3<sup>rd</sup> instar larval wing imaginal discs from were sorted into G1  
492 and S populations by a FACS Aria II or III based on DAPI intensity and subsequently pelleted,  
493 flash frozen, and stored at -80°C prior to DNA isolation and library preparation. Libraries were  
494 prepared with the Rubicon ThruPLEX DNA-seq kit for wing imaginal disc samples and with the  
495 NEBNext Ultra II DNA Library Prep kit for follicle cell samples and subjected to Illumina HiSeq  
496 2500 single-end 50bp sequencing for wing imaginal disc samples and Illumina HiSeq X or  
497 Novaseq 6000 paired-end 150bp sequencing for follicle cell samples.

### 498 **RT Characterization**

499 Reads from G1 and S samples were aligned to the dm6 reference genome (Release 6.04) using  
500 Bowtie 2 (v2.3.2) default parameters (Langmead et al. 2009). Reads with a MAPQ score greater  
501 than 10 were retained using SAMtools (v1.9) (Li et al. 2009). BEDTools coverage (v2.26.0) was  
502 used to quantify the number of reads mapping to each 100kb window, with results normalized to  
503 read depth (Quinlan and Hall 2010). Replication timing (RT) values were obtained by averaging  
504 the S/G1 ratio of reads per million (RPM) value from each S phase replicate for a particular  
505 window size. Profiles were generated by plotting the RT value at each window versus genomic  
506 location. Quantile normalization was performed for comparisons between samples through the  
507 preprocess Core R package to equalize the dynamic range of RT values (Bolstad 2016). The limma  
508 statistical package was used to identify 100kb windows with significantly altered RT values (lmFit,  
509 p value adjusted for multiple testing (p<0.01); absolute log<sub>2</sub> fold change > 0.1) (Newville et al.  
510 2014). BEDTools intersect (v2.26.0) was used to determine overlap of 100kb windows with -f 0.5

511 and -u parameters (Quinlan and Hall 2010). RT values and limma-generated adjusted p values at  
512 100kb windows were used to determine median RT values and adjusted p values at 10kb windows  
513 (BEDTools map v2.26.0), and the significance threshold was adjusted at 10kb windows (p value  
514 adjusted for multiple testing ( $p < 0.05$ ); absolute  $\log_2$  fold change  $> 0.1$ ) (Quinlan and Hall 2010).  
515 Coordinates of chromatin states were obtained from (Kharchenko et al. 2011) and converted to  
516 dm6 coordinates using the UCSC liftOver tool (Karolchik et al. 2004). To calculate RT domain  
517 sizes, we identified the genomic coordinates halfway between each peak and valley of an RT  
518 profile and determined the distance from one halfway point to the next.

519 For false discovery rate (FDR) calculations, spike-in RT bed files with  $3 \times 10^7$  reads were  
520 generated by combining either  $3 \times 10^5$  (1% impure),  $1.5 \times 10^6$  (5% impure),  $3 \times 10^6$  (10% impure),  
521  $7.5 \times 10^6$  (25% impure), or  $1.5 \times 10^7$  (50% impure) randomly selected reads from each wing disc  
522 S phase replicate with  $2.97 \times 10^7$  (1% impure),  $2.85 \times 10^7$  (5% impure),  $2.7 \times 10^7$  (10% impure),  
523  $2.25 \times 10^7$  (25% impure), or  $1.5 \times 10^7$  (50% impure) randomly selected reads from each mitotically  
524 cycling follicle cell S phase replicate. RT profiles generated from each test dataset (1% impure,  
525 5% impure, 10% impure, 25% impure, and 50% impure) were directly compared to RT profiles  
526 from wing discs, and differential replication timing was identified as before using the limma  
527 statistical package (lmFit, p value adjusted for multiple testing ( $p < 0.01$ ); absolute  $\log_2$  fold change  
528  $> 0.1$ ) (Newville et al. 2014). We estimate that 50% of the “mitotic” follicle cell population consists  
529 of endocycling follicle cells due to the following rationale: Because the total number of follicle  
530 cells in an egg chamber after the completion of the mitotic cell divisions is 1,024, the 2C-4C  
531 population used for sorting contains  $2^{10}$  (1,024) mitotically cycling follicle cells from all egg  
532 chambers prior to Stage 7 per ovariole and (at most) 1,024 endocycling follicle cells from the Stage  
533 7 egg chamber per ovariole.

534 **RNA Analyses**

535 *Follicle cell isolation, RNA extraction and sequencing:* Follicle cells were isolated by trypsinizing  
536 ovaries from *OregonR* or *Rif1<sup>1</sup>/Rif1<sup>2</sup>* females as described in (Cayirlioglu et al. 2003; Kim et al.  
537 2011). Follicle cells were FACS sorted into TRIzol LS (Invitrogen) based on their ploidy and RNA  
538 was extracted according to the manufacture's recommendation. 250,000 – 500,000 follicle cells  
539 were used per replicate. rRNA was depleted using the RiboMinus™ Eukaryote Kit for RNA-Seq  
540 (Invitrogen) and libraries were prepared using the NEBNext® Ultra™ II RNA Library Prep.

541 *Wing disc isolation, RNA extraction and sequencing:* Total RNA was isolated from 40 *yw* and  
542 *Rif1<sup>1</sup>/Rif1<sup>2</sup>* female 3<sup>rd</sup> instar wing imaginal discs. Wing imaginal discs were homogenized in Trizol  
543 (Invitrogen) and flash frozen in liquid nitrogen. RNA was isolated using the Direct-zol RNA  
544 miniprep kit (Zymo Research). rRNA was depleted and libraries were prepared using the Ovation  
545 *Drosophila* RNA-Seq system (NuGEN). RNA isolated from *yw* wing imaginal discs was also  
546 made into libraries and sequenced with follicle cell RNA for all comparisons in Figure 2.

547 *RNA seq analysis:* TopHat default parameters (v2.1.1) (Trapnell et al. 2012) were used to align  
548 paired-end reads to the dm6 version of the *Drosophila* genome. Transcriptomes were generated  
549 using Cufflinks (v2.2.1, see supplementary materials for parameters). Differentially expressed  
550 transcripts were determined via edgeR statistical analysis (p value <0.01) (Robinson et al. 2010;  
551 McCarthy et al. 2012). For analyses comparison transcription to RT at 10kb windows, we either  
552 assigned the average RNA log<sub>2</sub> fold change and average adjusted p-value from all transcripts  
553 overlapping each 10kb window or we assigned the log<sub>2</sub> fold-change of the transcript with the  
554 lowest edgeR-generated p value at each 10kb window for analyses directly comparing RT and  
555 transcription. Results were similar irrespective of how transcription was assigned to RT windows.

556 **Data access**

557 The data generated as a part of this study have been submitted to the NCBI Gene Expression  
558 Omnibus (GEO) under accession number GSE141632.

### 559 **Acknowledgements**

560 This work was supported by NIH Grants R01-GM124201 to R.J.D and NSF MCB 1818019 to  
561 J.T.N. In addition, R.L.A. was supported in part by an NIH predoctoral training grant T32-  
562 GM007092. We thank the UNC Flow Cytometry and High Throughput Sequencing Core  
563 Facilities, supported in part by P30 CA016086 Cancer Center Core Support Grant to the UNC  
564 Lineberger Comprehensive Cancer Center. FACS results reported in this publication were  
565 supported in part by the North Carolina Biotechnology Center Institutional Support Grant 2012-  
566 IDG-1006. Flow Cytometry experiments were performed in the VMC Flow Cytometry Shared  
567 Resource. The VMC Flow Cytometry Shared Resource is supported by the Vanderbilt Ingram  
568 Cancer Center (P30 CA68485) and the Vanderbilt Digestive Disease Research Center  
569 (DK058404).

### 570 **Disclosure Declaration**

571 The authors express no conflict of interest.

572 **References**

- 573 Almeida R, Fernández-Justel JM, Santa-María C, Cadoret J-C, Cano-Aroca L, Lombraña R,  
574 Herranz G, Agresti A, Gómez M. 2018. Chromatin conformation regulates the  
575 coordination between DNA replication and transcription. *Nature Communications* **9**:  
576 1590.
- 577 Alver RC, Chadha GS, Gillespie PJ, Blow JJ. 2017. Reversal of DDK-Mediated MCM  
578 Phosphorylation by Rif1-PP1 Regulates Replication Initiation and Replisome Stability  
579 Independently of ATR/Chk1. *Cell Reports* **18**: 2508-2520.
- 580 Armstrong RL, Penke TJR, Strahl BD, Matera AG, McKay DJ, MacAlpine DM, Duronio RJ.  
581 2018. Chromatin conformation and transcriptional activity are permissive regulators of  
582 DNA replication initiation in *Drosophila*. *Genome Research* doi:10.1101/gr.239913.118.
- 583 Bell SP, Stillman B. 1992. ATP-dependent recognition of eukaryotic origins of DNA replication  
584 by a multiprotein complex. *Nature* **357**: 128.
- 585 Bolstad BM. 2016. preprocessCore: A collection of pre-processing functions. *R package version*  
586 *1.360*.
- 587 Buonomo SBC, Wu Y, Ferguson D, de Lange T. 2009. Mammalian Rif1 contributes to  
588 replication stress survival and homology-directed repair. *The Journal of Cell Biology*  
589 **187**: 385-398.
- 590 Calvi BR, Lilly MA, Spradling AC. 1998. Cell cycle control of chorion gene amplification.  
591 *Genes & Development* **12**: 734-744.

- 592 Cayirlioglu P, Ward WO, Silver Key SC, Duronio RJ. 2003. Transcriptional repressor functions  
593 of *Drosophila* E2F1 and E2F2 cooperate to inhibit genomic DNA synthesis in ovarian  
594 follicle cells. *Mol Cell Biol* **23**: 2123-2134.
- 595 Collart C, Allen GE, Bradshaw CR, Smith JC, Zegerman P. 2013. Titration of Four Replication  
596 Factors Is Essential for the *Xenopus laevis* Midblastula Transition. *Science* **341**: 893-896.
- 597 Cornacchia D, Dileep V, Quivy JP, Foti R, Tili F, Santarella-Mellwig R, Antony C, Almouzni G,  
598 Gilbert DM, Buonomo SBC. 2012. Mouse Rif1 is a key regulator of the replication-  
599 timing programme in mammalian cells. *The EMBO Journal* **31**: 3678-3690.
- 600 Davé A, Cooley C, Garg M, Bianchi A. 2014. Protein Phosphatase 1 Recruitment by Rif1  
601 Regulates DNA Replication Origin Firing by Counteracting DDK Activity. *Cell Reports*  
602 **7**: 53-61.
- 603 Donley N, Thayer MJ. 2013. DNA replication timing, genome stability and cancer: Late and/or  
604 delayed DNA replication timing is associated with increased genomic instability.  
605 *Seminars in Cancer Biology* **23**: 80-89.
- 606 Eaton ML, Prinz JA, MacAlpine HK, Tretyakov G, Kharchenko PV, MacAlpine DM. 2011.  
607 Chromatin signatures of the *Drosophila* replication program. *Genome Research* **21**: 164-  
608 174.
- 609 Edgar BA, Orr-Weaver TL. 2001. Endoreplication cell cycles: more for less. *Cell* **105**: 297-306.
- 610 Edgar BA, Zielke N, Gutierrez C. 2014. Endocycles: a recurrent evolutionary innovation for  
611 post-mitotic cell growth. *Nature Reviews Molecular Cell Biology* **15**: 197-210.

- 612 Foti R, Gnan S, Cornacchia D, Dileep V, Bulut-Karslioglu A, Diehl S, Bunes A, Klein Felix A,  
613 Huber W, Johnstone E et al. 2016. Nuclear Architecture Organized by Rif1 Underpins the  
614 Replication-Timing Program. *Molecular Cell* **61**: 1-14.
- 615 Fox DT, Duronio RJ. 2013. Endoreplication and polyploidy: insights into development and  
616 disease. *Development* **140**: 3-12.
- 617 Ghavi-Helm Y, Jankowski A, Meiers S, Viales RR, Korbel JO, Furlong EEM. 2019. Highly  
618 rearranged chromosomes reveal uncoupling between genome topology and gene  
619 expression. *Nature Genetics* **51**: 1272-1282.
- 620 Hayano M, Kanoh Y, Matsumoto S, Renard-Guillet C, Shirahige K, Masai H. 2012. Rif1 is a  
621 global regulator of timing of replication origin firing in fission yeast. *Genes &*  
622 *Development* **26**: 137-150.
- 623 Hiraga S-i, Alvino GM, Chang F, Lian H-y, Sridhar A, Kubota T, Brewer BJ, Weinreich M,  
624 Raghuraman MK, Donaldson AD. 2014. Rif1 controls DNA replication by directing  
625 Protein Phosphatase 1 to reverse Cdc7-mediated phosphorylation of the MCM complex.  
626 *Genes & Development* **28**: 372-383.
- 627 Hiraga Si, Ly T, Garzón J, Hořejší Z, Ohkubo Yn, Endo A, Obuse C, Boulton SJ, Lamond AI,  
628 Donaldson AD. 2017. Human RIF1 and protein phosphatase 1 stimulate DNA replication  
629 origin licensing but suppress origin activation. *EMBO Reports*  
630 doi:10.15252/embr.201641983.

- 631 Hiratani I, Ryba T, Itoh M, Rathjen J, Kulik M, Papp B, Fussner E, Bazett-Jones DP, Plath K,  
632 Dalton S et al. 2010. Genome-wide dynamics of replication timing revealed by in vitro  
633 models of mouse embryogenesis. *Genome Research* **20**: 155-169.
- 634 Hiratani I, Ryba T, Itoh M, Yokochi T, Schwaiger M, Chang C-W, Lyou Y, Townes TM,  
635 Schübeler D, Gilbert DM. 2008. Global Reorganization of Replication Domains During  
636 Embryonic Stem Cell Differentiation. *PLOS Biology* **6**: e245.
- 637 Hua BL, Bell GW, Kashevsky H, Von Stetina JR, Orr-Weaver TL. 2018. Dynamic changes in  
638 ORC localization and replication fork progression during tissue differentiation. *BMC*  
639 *Genomics* **19**: 623.
- 640 Karolchik D, Hinrichs AS, Furey TS, Roskin KM, Sugnet CW, Haussler D, Kent WJ. 2004. The  
641 UCSC Table Browser data retrieval tool. *Nucleic Acids Research* **32**: D493-D496.
- 642 Kharchenko PV, Aleksyenko AA, Schwartz YB, Minoda A, Riddle NC, Ernst J, Sobo PJ,  
643 Larschan E, Gorchakov AA, Gu T et al. 2011. Comprehensive analysis of the chromatin  
644 landscape in *Drosophila*. *Nature* **471**: 480-485.
- 645 Kim JC, Nordman J, Xie F, Kashevsky H, Eng T, Li S, MacAlpine DM, Orr-Weaver TL. 2011.  
646 Integrative analysis of gene amplification in *Drosophila* follicle cells: parameters of  
647 origin activation and repression. *Genes & Development* **25**: 1384-1398.
- 648 Koren A, Polak P, Nemesh J, Michaelson Jacob J, Sebat J, Sunyaev Shamil R, McCarroll  
649 Steven A. 2012. Differential Relationship of DNA Replication Timing to Different Forms  
650 of Human Mutation and Variation. *American Journal of Human Genetics* **91**: 1033-1040.



- 651 Langmead B, Trapnell C, Pop M, Salzberg SL. 2009. Ultrafast and memory-efficient alignment  
652 of short DNA sequences to the human genome. *Genome Biology* **10**: R25.
- 653 Li H, Handsaker B, Wysoker A, Fennell T, Ruan J, Homer N, Marth G, Abecasis G, Durbin R.  
654 2009. The Sequence Alignment/Map format and SAMtools. *Bioinformatics* **25**: 2078-  
655 2079.
- 656 Lilly MA, Spradling AC. 1996. The *Drosophila* endocycle is controlled by Cyclin E and lacks a  
657 checkpoint ensuring S-phase completion. *Genes & Development* **10**: 2514-2526.
- 658 Liu J, McConnell K, Dixon M, Calvi BR. 2012. Analysis of model replication origins in  
659 *Drosophila* reveals new aspects of the chromatin landscape and its relationship to origin  
660 activity and the prereplicative complex. *Molecular Biology of the Cell* **23**: 200-212.
- 661 Lubelsky Y, Prinz JA, DeNapoli L, Li Y, Belsky JA, MacAlpine DM. 2014. DNA replication  
662 and transcription programs respond to the same chromatin cues. *Genome Research* **24**:  
663 1102-1114.
- 664 MacAlpine DM, Rodriguez HK, Bell SP. 2004. Coordination of replication and transcription  
665 along a *Drosophila* chromosome. *Genes & Development* **18**: 3094-3105.
- 666 MacAlpine HK, Gordân R, Powell SK, Hartemink AJ, MacAlpine DM. 2010. *Drosophila* ORC  
667 localizes to open chromatin and marks sites of cohesin complex loading. *Genome*  
668 *Research* **20**: 201-211.

- 669 Mantiero D, Mackenzie A, Donaldson A, Zegerman P. 2011. Limiting replication initiation  
670 factors execute the temporal programme of origin firing in budding yeast. *The EMBO*  
671 *Journal* **30**: 4805-4814.
- 672 Maqbool SB, Mehrotra S, Kolpakas A, Durden C, Zhang B, Zhong H, Calvi BR. 2010.  
673 Dampened activity of E2F1-DP and Myb-MuvB transcription factors in *Drosophila*  
674 endocycling cells. *J Cell Sci* **123**: 4095-4106.
- 675 Mattarocci S, Shyian M, Lemmens L, Damay P, Altintas Dogus M, Shi T, Bartholomew  
676 Clinton R, Thomä NH, Hardy Christopher FJ, Shore D. 2014. Rif1 Controls DNA  
677 Replication Timing in Yeast through the PP1 Phosphatase Glc7. *Cell Reports* **7**: 62-69.
- 678 McCarthy DJ, Chen Y, Smyth GK. 2012. Differential expression analysis of multifactor RNA-  
679 Seq experiments with respect to biological variation. *Nucleic Acids Research* **40**: 4288-  
680 4297.
- 681 Miotto B, Ji Z, Struhl K. 2016. Selectivity of ORC binding sites and the relation to replication  
682 timing, fragile sites, and deletions in cancers. *Proceedings of the National Academy of*  
683 *Sciences of the United States of America* **113**: E4810-4819.
- 684 Munden A, Rong Z, Sun A, Gangula R, Mallal S, Nordman JT. 2018. Rif1 inhibits replication  
685 fork progression and controls DNA copy number in *Drosophila*. *eLife* **7**: e39140.
- 686 Newville M, Stensitzki T, Allen DB, Ingargiola A. 2014. LMFIT: Non-Linear Least-Square  
687 Minimization and Curve-Fitting for Python. *Zenodo* doi:10.5281/zenodo.11813.

- 688 Peace JM, Ter-Zakarian A, Aparicio OM. 2014. Rif1 Regulates Initiation Timing of Late  
689 Replication Origins throughout the *S. cerevisiae* Genome. *PLoS One* **9**: e98501.
- 690 Pope BD, Ryba T, Dileep V, Yue F, Wu W, Denas O, Vera DL, Wang Y, Hansen RS, Canfield  
691 TK et al. 2014. Topologically associating domains are stable units of replication-timing  
692 regulation. *Nature* **515**: 402-405.
- 693 Quinlan AR, Hall IM. 2010. BEDTools: a flexible suite of utilities for comparing genomic  
694 features. *Bioinformatics* **26**: 841-842.
- 695 Rivera-Mulia JC, Buckley Q, Sasaki T, Zimmerman J, Didier RA, Nazor K, Loring JF, Lian Z,  
696 Weissman S, Robins AJ et al. 2015. Dynamic changes in replication timing and gene  
697 expression during lineage specification of human pluripotent stem cells. *Genome*  
698 *Research* **25**: 1091-1103.
- 699 Rivera-Mulia JC, Gilbert DM. 2016. Replication timing and transcriptional control: beyond  
700 cause and effect — part III. *Current Opinion in Cell Biology* **40**: 168-178.
- 701 Robinson MD, McCarthy DJ, Smyth GK. 2010. edgeR: a Bioconductor package for differential  
702 expression analysis of digital gene expression data. *Bioinformatics* **26**: 139-140.
- 703 Rotelli MD, Policastro RA, Bolling AM, Killion AW, Weinberg AJ, Dixon MJ, Zentner GE,  
704 Walczak CE, Lilly MA, Calvi BR. 2019. A Cyclin A-Myb-MuvB-Aurora B network  
705 regulates the choice between mitotic cycles and polyploid endoreplication cycles. *PLoS*  
706 *Genetics* **15**: e1008253.

- 707 Ryba T, Hiratani I, Lu J, Itoh M, Kulik M, Zhang J, Schulz TC, Robins AJ, Dalton S, Gilbert  
708 DM. 2010. Evolutionarily conserved replication timing profiles predict long-range  
709 chromatin interactions and distinguish closely related cell types. *Genome Research* **20**:  
710 761-770.
- 711 Schwaiger M, Stadler MB, Bell O, Kohler H, Oakeley EJ, Schübeler D. 2009. Chromatin state  
712 marks cell-type- and gender-specific replication of the *Drosophila* genome. *Genes &*  
713 *Development* **23**: 589-601.
- 714 Seller CA, O'Farrell PH. 2018. Rif1 prolongs the embryonic S phase at the *Drosophila* mid-  
715 blastula transition. *PLOS Biology* **16**: e2005687.
- 716 Sher N, Bell GW, Li S, Nordman JT, Eng T, Eaton ML, MacAlpine DM, Orr-Weaver TL. 2012.  
717 Developmental control of gene copy number by repression of replication initiation and  
718 fork progression. *Genome Research* **22**: 64-75.
- 719 Siefert JC, Georgescu C, Wren JD, Koren A, Sansam CL. 2017. DNA replication timing during  
720 development anticipates transcriptional programs and parallels enhancer activation.  
721 *Genome Research* **27**: 1406-1416.
- 722 Sreesankar E, Bharathi V, Mishra RK, Mishra K. 2015. *Drosophila* Rif1 is an essential gene and  
723 controls late developmental events by direct interaction with PP1-87B. *Sci Rep* **5**.
- 724 Stamatoyannopoulos JA, Adzhubei I, Thurman RE, Kryukov GV, Mirkin SM, Sunyaev SR.  
725 2009. Human mutation rate associated with DNA replication timing. *Nature Genetics* **41**:  
726 393.

- 727 Sukackaite R, Cornacchia D, Jensen MR, Mas PJ, Blackledge M, Enervald E, Duan G,  
728 Auchynnikava T, Kohn M, Hart DJ et al. 2017. Mouse Rif1 is a regulatory subunit of  
729 protein phosphatase 1 (PP1). *Scientific Reports* 7: 2119.
- 730 Trapnell C, Roberts A, Goff L, Pertea G, Kim D, Kelley DR, Pimentel H, Salzberg SL, Rinn JL,  
731 Pachter L. 2012. Differential gene and transcript expression analysis of RNA-seq  
732 experiments with TopHat and Cufflinks. *Nature Protocols* 7: 562.
- 733 Yamazaki S, Ishii A, Kanoh Y, Oda M, Nishito Y, Masai H. 2012. Rif1 regulates the replication  
734 timing domains on the human genome. *The EMBO Journal* 31: 3667-3677.
- 735 Zhang H, Petrie MV, He Y, Peace JM, Chiolo IE, Aparicio OM. 2019. Dynamic relocalization of  
736 replication origins by Fkh1 requires execution of DDK function and Cdc45 loading at  
737 origins. *eLife* 8: e45512.
- 738
